# Supplementary material for: MiRComb: An R Package to Analyse miRNA-mRNA Interactions. Examples across Five Digestive Cancers
Source: PLOS journal article supplement (doi:10.1371/journal.pone.0151127), 2016-03-11
Supplement: S7 (10.1371/journal.pone.0151127.s007) [file journal.pone.0151127.s007]

# Default miRComb output

/home/mvila/Baixades/TCGA/stomach

May 13, 2015

## 1 Exploratory analysis of miRNA dataset

|                           |     |
|---------------------------|-----|
| Number of miRNAs analysed | 330 |
| Number of samples         | 443 |

Table 1: Basic information of the miRNA dataset.

|   | group.n | CvH            | center      | sample             | batch         |
|---|---------|----------------|-------------|--------------------|---------------|
| 1 | NT: 37  | Min. :0.0000   | BR :138     | TCGA-3M-AB46-01: 1 | Batch 220: 58 |
| 2 | TP:406  | 1st Qu.:1.0000 | VQ : 66     | TCGA-3M-AB47-01: 1 | Batch 427: 58 |
| 3 |         | Median :1.0000 | CG : 43     | TCGA-B7-5816-01: 1 | Batch 269: 52 |
| 4 |         | Mean :0.9165   | HU : 41     | TCGA-B7-5818-01: 1 | Batch 57 : 31 |
| 5 |         | 3rd Qu.:1.0000 | D7 : 40     | TCGA-B7-A5TI-01: 1 | Batch 95 : 29 |
| 6 |         | Max. :1.0000   | CD : 27     | TCGA-B7-A5TJ-01: 1 | Batch 242: 28 |
| 7 |         |                | (Other): 88 | (Other) :437       | (Other) :187  |

Table 2: Summary of the phenotypical information of the miRNA dataset.

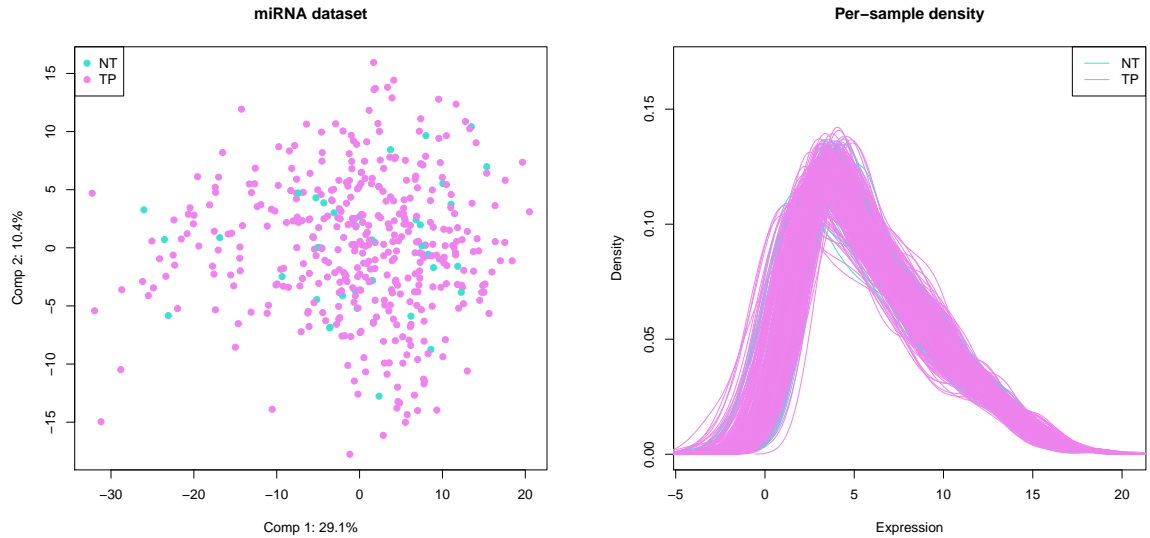

Figure 1: PCA and density plot for miRNAs.

## 2 Exploratory analysis of mRNA dataset

|                          |       |
|--------------------------|-------|
| Number of mRNAs analysed | 18565 |
| Number of samples        | 443   |

Table 3: Basic information of the mRNA dataset.

|   | group.n | CvH            | center      | sample             | batch         |
|---|---------|----------------|-------------|--------------------|---------------|
| 1 | NT: 37  | Min. :0.0000   | BR :138     | TCGA-3M-AB46-01: 1 | Batch 220: 58 |
| 2 | TP:406  | 1st Qu.:1.0000 | VQ : 66     | TCGA-3M-AB47-01: 1 | Batch 427: 58 |
| 3 |         | Median :1.0000 | CG : 43     | TCGA-B7-5816-01: 1 | Batch 269: 52 |
| 4 |         | Mean :0.9165   | HU : 41     | TCGA-B7-5818-01: 1 | Batch 57 : 31 |
| 5 |         | 3rd Qu.:1.0000 | D7 : 40     | TCGA-B7-A5TI-01: 1 | Batch 95 : 29 |
| 6 |         | Max. :1.0000   | CD : 27     | TCGA-B7-A5TJ-01: 1 | Batch 242: 28 |
| 7 |         |                | (Other): 88 | (Other) :437       | (Other) :187  |

Table 4: Summary of the phenotypical information of the mRNA dataset.

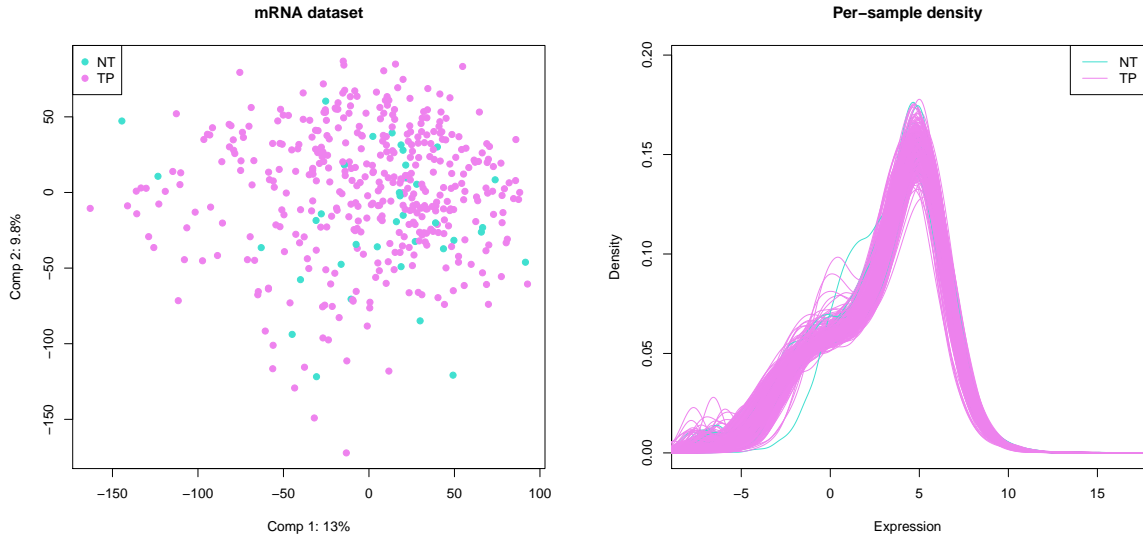

Figure 2: PCA and density plot for mRNAs.

### 3 Differentially expressed miRNAs

|                                           |                                            |
|-------------------------------------------|--------------------------------------------|
| Analysis performed                        | Comparative used: CvH; method used: limma. |
| Number of differentially expressed miRNAs | 330 ( 150 upregulated, 180 downregulated)  |
| Number of samples                         | 443                                        |
| Criteria for selecting miRNAs             | adj.pval < 1                               |

Table 5: Basic statistics

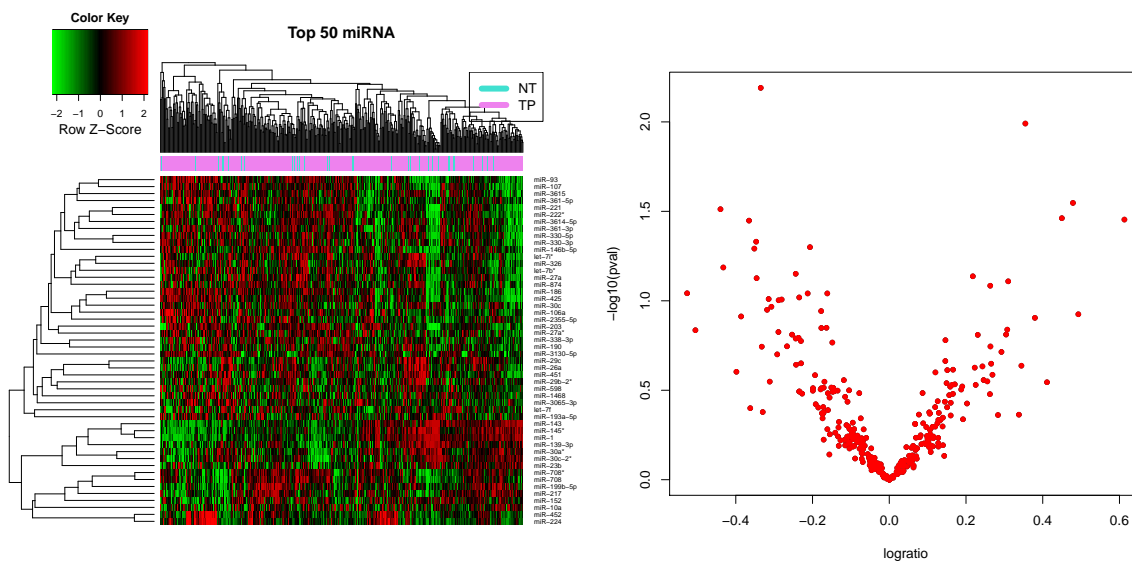

Figure 3: A) Heatmap with the top 50 most significant miRNAs (sorted by adjusted p-value). B) Volcano plot showing the selected miRNAs.

## 4 Differentially expressed mRNAs

|                                          |                                                |
|------------------------------------------|------------------------------------------------|
| Analysis performed                       | Comparative used: CvH; method used: limma.     |
| Number of differentially expressed mRNAs | 18565 ( 10588 upregulated, 7977 downregulated) |
| Number of samples                        | 443                                            |
| Criteria for selecting mRNAs             | adj.pval < 1                                   |

Table 6: Basic statistics

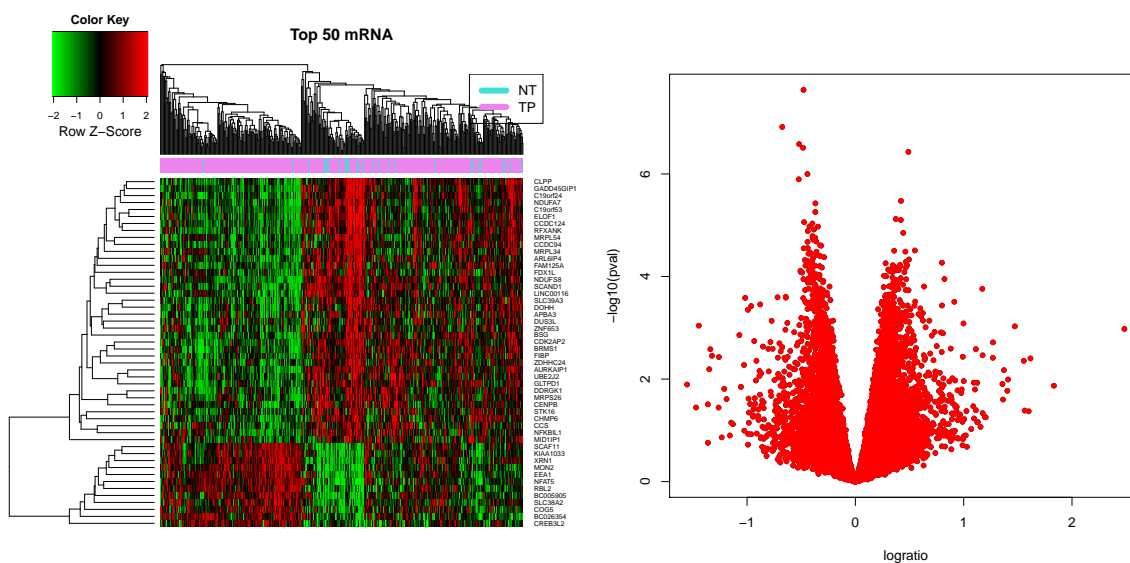

Figure 4: A) Heatmap with the top 50 most significant mRNAs (sorted by adjusted p-value). B) Volcano plot showing the selected mRNAs.

## 5 Correlation & intersection with databases

|                               |         |
|-------------------------------|---------|
| Number of miRNAs              | 330     |
| Number of mRNAs               | 18565   |
| Total miRNA-mRNA combinations | 6126450 |
| Number of samples             | 443     |

Table 7: Number of miRNAs, mRNAs and samples used for correlation.

|                                    | Number  | %     |
|------------------------------------|---------|-------|
| Total correlations                 | 6126450 | 100   |
| Total negative correlations        | 2828695 | 46.17 |
| Total correlations $p < 0.05$      | 1730533 | 28.25 |
| Total correlations $p < 0.01$      | 1367300 | 22.32 |
| Total correlations adj. $p < 0.05$ | 1390596 | 22.7  |
| Total correlations adj. $p < 0.01$ | 1108323 | 18.09 |

Table 8: Basic statistics for correlation results. Correlation hypothesis: two.sided.

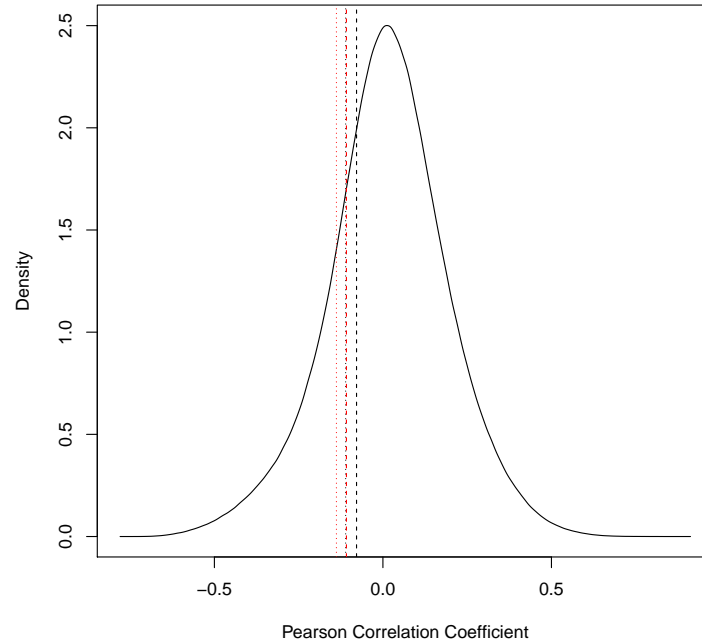

Figure 5: Density of a total of 6126450 miRNA-mRNA pairs. Dashed lines distinguish correlations whose p-value is lower than 0.05, dotted lines for 0.01. Black is for raw p-value and red for adjusted p-value.

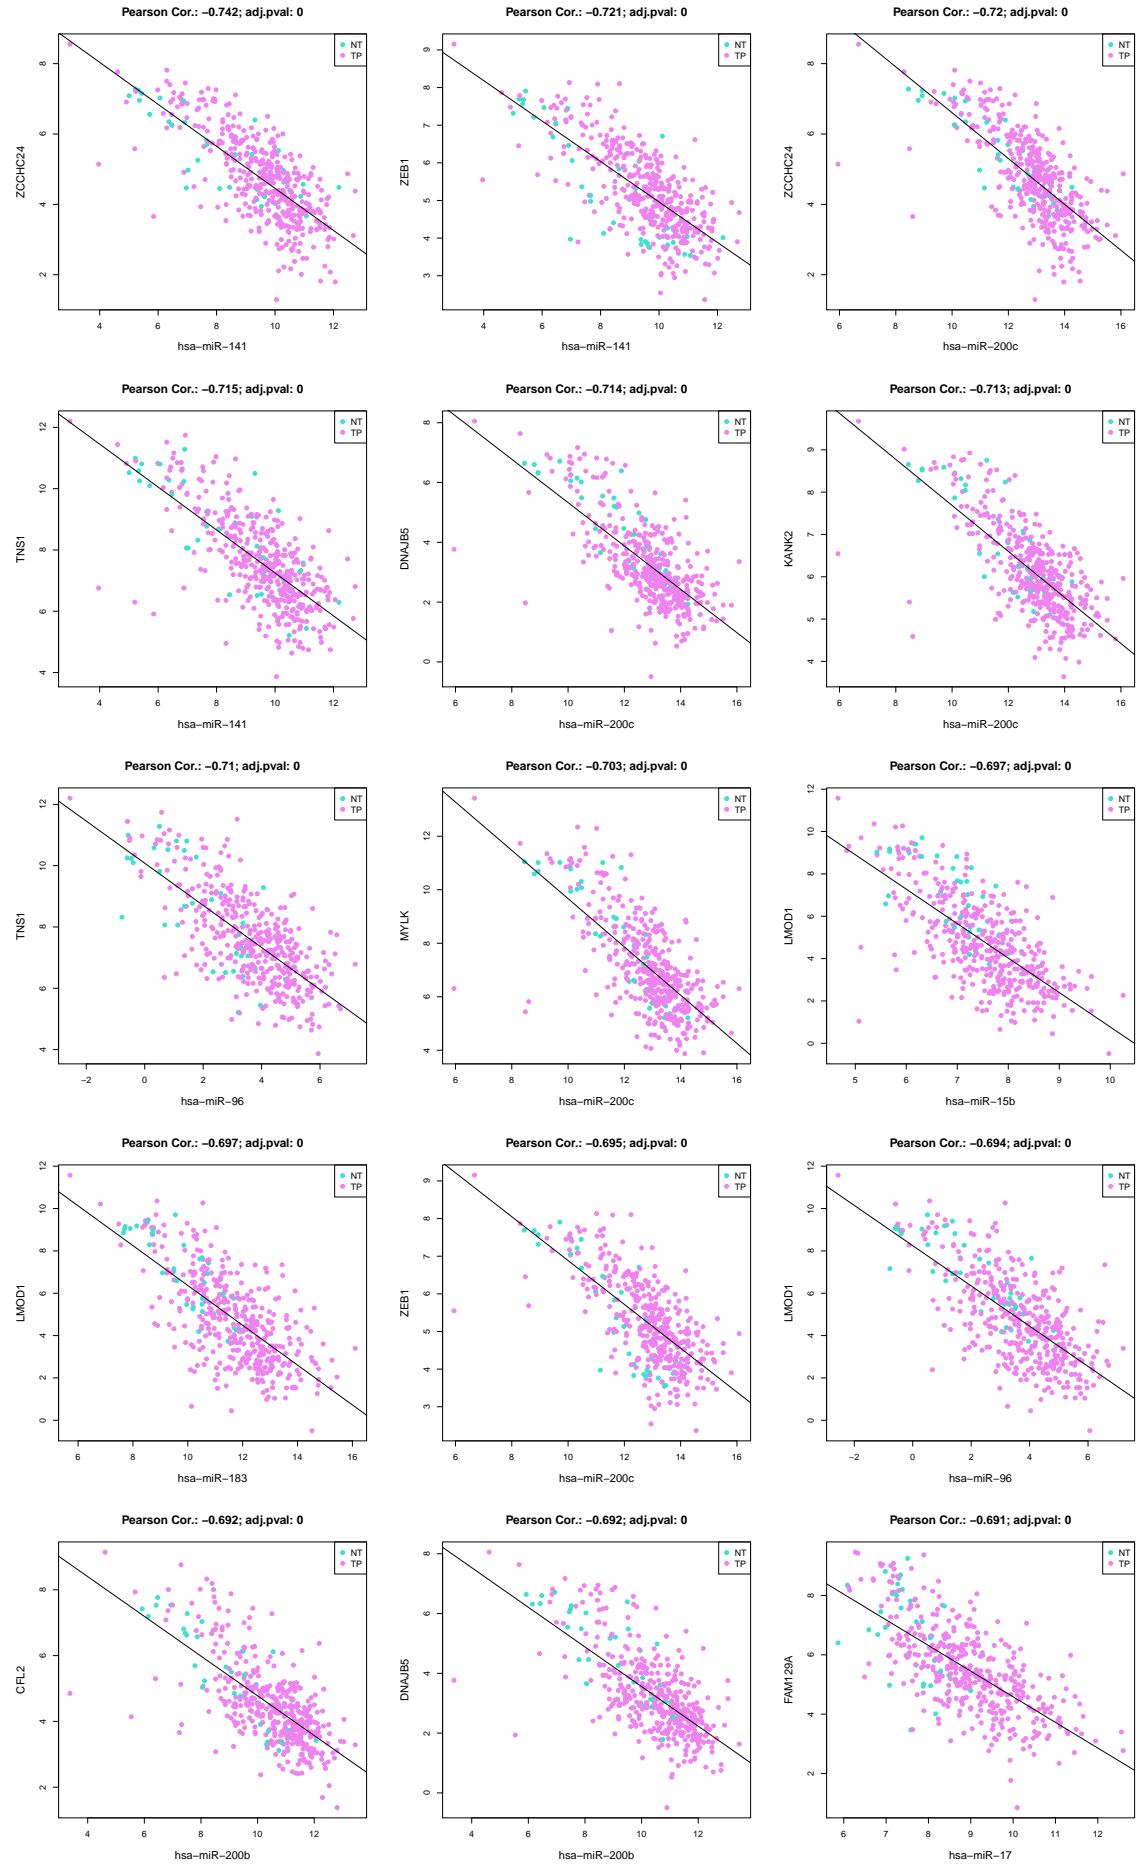

Figure 6: Plot of 15 top correlations, sorted by adjusted p-value. Databases used: microCosm\_v5.18, targetScan\_v6.2.18 (each miRNA-mRNA pair has to appear at least 1 times).

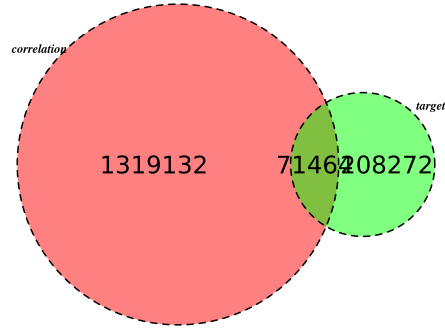

Figure 7: Venn Diagram. Left (red): number of miRNA-mRNA pairs with adjusted p-value < 0.05. Right (green): number of all the theoretical miRNA-mRNA pairs reported at least 1 times in the following databases: microCosm\_v5\_18, targetScan\_v6.2\_18. Intersection: miRNA-mRNA pairs that fulfil both conditions.

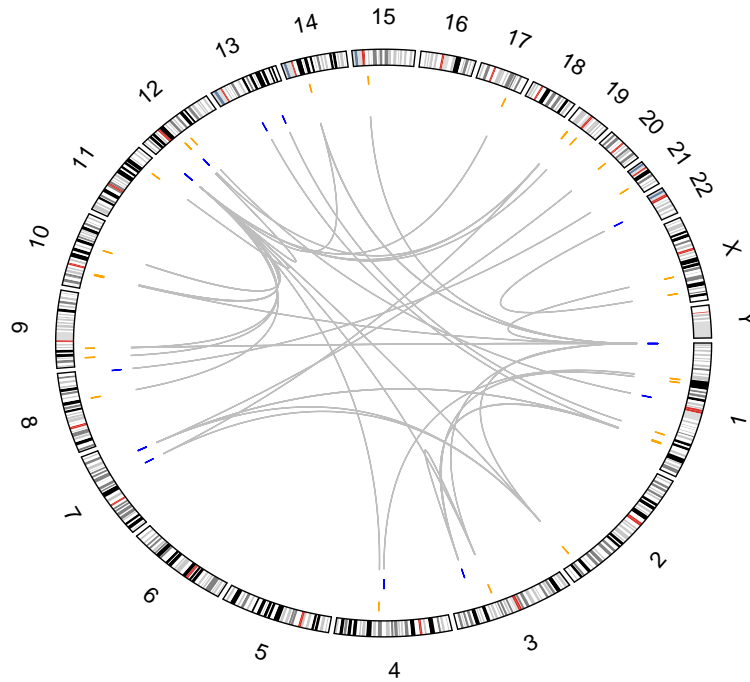

Figure 8: Circos plot for the first 45 miRNA-mRNA pairs (sorted by adjusted p-value) that have: pval-corrected < 0.05 and appear at least 1 times in the following databases: microCosm\_v5\_18, targetScan\_v6.2\_18. Blue: miRNAs, Orange: target mRNAs

| miRNA          | mRNA    | cor   | adj.pval | FC.miRNA | FC.mRNA | dat.sum |
|----------------|---------|-------|----------|----------|---------|---------|
| hsa-miR-141    | ZCCHC24 | -0.74 | 1.01e-72 | 1.02     | 1.03    | 1       |
| hsa-miR-141    | ZEB1    | -0.72 | 5.00e-67 | 1.02     | 1.24    | 1       |
| hsa-miR-200c   | ZCCHC24 | -0.72 | 1.46e-66 | -1.01    | 1.03    | 1       |
| hsa-miR-141    | TNS1    | -0.72 | 2.39e-65 | 1.02     | 1.10    | 1       |
| hsa-miR-200c   | DNAJB5  | -0.71 | 3.50e-65 | -1.01    | 1.03    | 1       |
| hsa-miR-200c   | KANK2   | -0.71 | 8.71e-65 | -1.01    | 1.00    | 1       |
| hsa-miR-96     | TNS1    | -0.71 | 4.03e-64 | -1.05    | 1.10    | 1       |
| hsa-miR-200c   | MYLK    | -0.70 | 1.49e-62 | -1.01    | 1.15    | 1       |
| hsa-miR-15b    | LMOD1   | -0.70 | 5.93e-61 | -1.12    | -1.08   | 1       |
| hsa-miR-183    | LMOD1   | -0.70 | 5.93e-61 | 1.03     | -1.08   | 1       |
| hsa-miR-200c   | ZEB1    | -0.69 | 1.32e-60 | -1.01    | 1.24    | 2       |
| hsa-miR-96     | LMOD1   | -0.69 | 2.02e-60 | -1.05    | -1.08   | 1       |
| hsa-miR-200b   | CFL2    | -0.69 | 5.90e-60 | -1.01    | 1.15    | 1       |
| hsa-miR-200b   | DNAJB5  | -0.69 | 7.89e-60 | -1.01    | 1.03    | 1       |
| hsa-miR-17     | FAM129A | -0.69 | 1.38e-59 | 1.04     | 1.00    | 1       |
| hsa-miR-15b    | MYLK    | -0.69 | 7.07e-59 | -1.12    | 1.15    | 1       |
| hsa-miR-15b*   | NEXN    | -0.69 | 1.45e-58 | -1.10    | 1.02    | 1       |
| hsa-miR-429    | CFL2    | -0.69 | 1.80e-58 | -1.06    | 1.15    | 1       |
| hsa-miR-141    | DIXDC1  | -0.69 | 1.94e-58 | 1.02     | 1.15    | 1       |
| hsa-miR-130b*  | FHL1    | -0.68 | 1.45e-57 | -1.04    | 1.14    | 1       |
| hsa-miR-942    | MSRB3   | -0.68 | 2.22e-57 | -1.13    | 1.25    | 1       |
| hsa-miR-151-5p | JAM2    | -0.68 | 6.62e-57 | 1.04     | -1.00   | 1       |
| hsa-miR-96     | MYL9    | -0.68 | 9.62e-57 | -1.05    | -1.08   | 1       |
| hsa-miR-141    | TSHZ3   | -0.68 | 2.25e-56 | 1.02     | 1.13    | 2       |
| hsa-miR-16     | LMOD1   | -0.68 | 2.42e-56 | 1.03     | -1.08   | 1       |
| hsa-miR-141    | SVIL    | -0.67 | 4.26e-56 | 1.02     | 1.23    | 1       |
| hsa-miR-200a   | TNS1    | -0.67 | 4.96e-56 | -1.01    | 1.10    | 1       |
| hsa-miR-200c   | CFL2    | -0.67 | 5.07e-56 | -1.01    | 1.15    | 1       |
| hsa-miR-141    | MAP3K3  | -0.67 | 5.13e-56 | 1.02     | 1.06    | 1       |
| hsa-miR-141    | SYNPO2  | -0.67 | 5.34e-56 | 1.02     | 1.16    | 1       |
| hsa-miR-141    | BNC2    | -0.67 | 5.72e-56 | 1.02     | 1.31    | 1       |
| hsa-miR-15a    | LMOD1   | -0.67 | 1.24e-55 | 1.06     | -1.08   | 1       |
| hsa-miR-106b   | TNS1    | -0.67 | 1.34e-55 | -1.04    | 1.10    | 1       |
| hsa-miR-429    | MYLK    | -0.67 | 1.57e-55 | -1.06    | 1.15    | 1       |
| hsa-miR-141    | NECAB1  | -0.67 | 1.87e-55 | 1.02     | 1.10    | 1       |
| hsa-miR-200b*  | GPRASP1 | -0.67 | 3.08e-55 | -1.11    | 1.13    | 1       |
| hsa-miR-429    | DNAJB5  | -0.67 | 3.59e-55 | -1.06    | 1.03    | 1       |
| hsa-miR-200c   | POU6F1  | -0.67 | 1.09e-54 | -1.01    | 1.07    | 1       |
| hsa-miR-200a   | SVIL    | -0.67 | 1.14e-54 | -1.01    | 1.23    | 1       |
| hsa-miR-148b   | CNN1    | -0.67 | 1.73e-54 | -1.05    | -1.15   | 1       |
| hsa-miR-200b   | NDN     | -0.67 | 2.37e-54 | -1.01    | -1.04   | 2       |
| hsa-miR-15b    | PRELP   | -0.67 | 3.45e-54 | -1.12    | 1.11    | 1       |
| hsa-miR-576-5p | NEGR1   | -0.67 | 3.77e-54 | 1.04     | 1.06    | 1       |
| hsa-miR-106b   | CNN1    | -0.66 | 5.20e-54 | -1.04    | -1.15   | 2       |
| hsa-miR-16     | MYLK    | -0.66 | 5.89e-54 | 1.03     | 1.15    | 1       |

Table 9: Top 45 miRNA-mRNA pairs(sorted by adjusted p-value) that have: pval-corrected<0.05 and appear at least 1 times in the following databases: micro-Cosm\_v5\_18, targetScan\_v6.2\_18.



## 6 Functional analysis

### 6.1 Network analysis

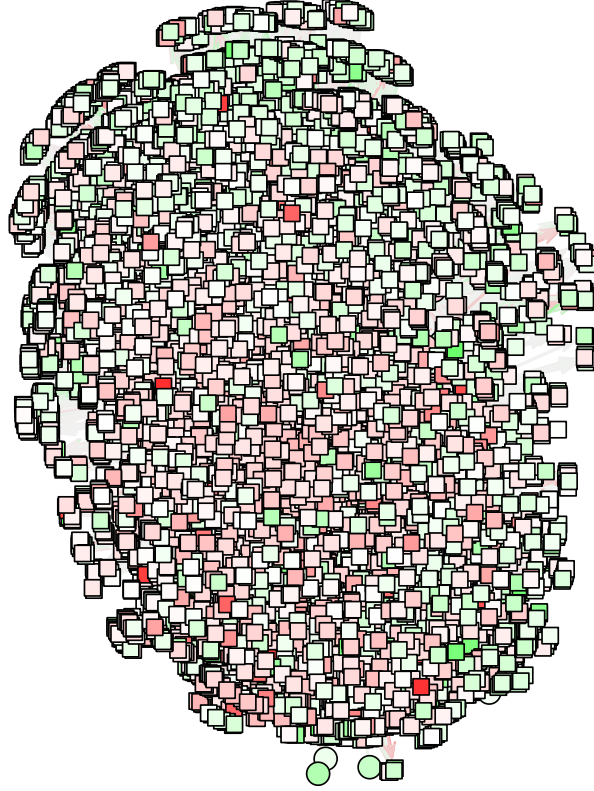

Figure 9: Network for all the miRNA-mRNA pairs that have:  $p\text{-val-corrected} < 0.05$  and appear at least 1 times in the following databases: microCosm\_v5\_18, targetScan\_v6.2\_18. Circles represent the miRNAs, and squares the mRNA. Red fill means upregulated miRNAs/mRNAs, while green fill means downregulated mRNA/mRNAs in comparative CvH; lines indicate the miRNA-mRNA pairs, red line means positive score and green line means negative score.

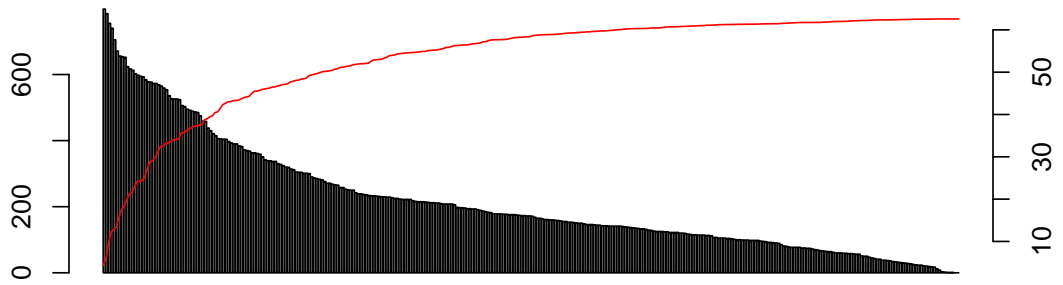

Figure 10: Barplot for miRNAs,  $p\text{-val-corrected} < 0.05$  and Targets=microCosm\_v5\_18, targetScan\_v6.2.18(minimum coincidences between databases:1). Red line (and right axis) represents the percentage of deregulated mRNAs that are targeted by the miRNAs.

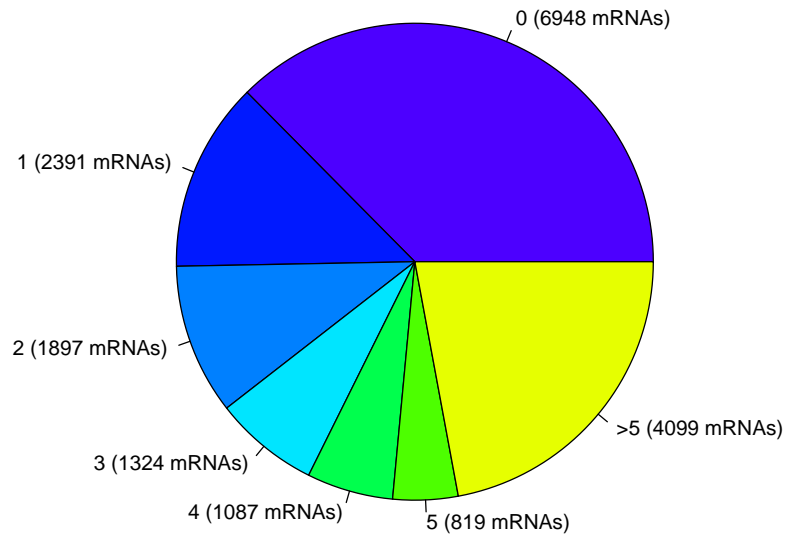

Figure 11: Pie chart representing the number of miRNAs targeting the mRNAs,  $p\text{-val-corrected} < 0.05$  and Targets=microCosm\_v5\_18, targetScan\_v6.2.18(minimum coincidences between databases:1).

| miRNA       | #targets | cum. % | targets (top 20)                                                                                                                                            |
|-------------|----------|--------|-------------------------------------------------------------------------------------------------------------------------------------------------------------|
| hsa-miR-29a | 798      | 4.3    | FEM1B, LAMC1, STRN3, FAM168B, PRKAB2, CBX1, ITGB1, KPNA4, TMTC3, ARNT, RBFOX2, ENAH, SESTD1, WDR26, C5orf24, KDELC1, ELF2, DIP2C, BTBD7, JMY                |
| hsa-miR-29c | 784      | 5.93   | COL11A1, FBXO45, PLEKHA8, KDELC1, CCNJ, CSE1L, LRRC58, MTHFD1L, CALU, KPNA4, USP31, CBX1, BMP1, TRIM37, XPO5, ABCE1, RIOK1, ZC3HAV1L, NKRF, SYNCRIP         |
| hsa-miR-195 | 755      | 9.28   | VMA21, TMEM33, ANLN, LRRC58, ZNF367, HNRNPA2B1, PEX13, SUZ12, NAA25, PSMD14, RAD23B, CLDN12, EPT1, CAPRIN1, FAM199X, SRPK1, GART, TMEM41B, ZNHIT3, KIAA1804 |
| hsa-miR-30b | 740      | 12.21  | PITPNB, NRP2, SNTB2, MBNL1, HIPK3, FRMD6, DDR2, SSH1, HCFC2, OSTM1, LATS2, VSTM4, QKI, TEAD1, PTGFRN, AFF4, LPP, SGCB, EDNRA, PNMA1                         |
| hsa-miR-29b | 705      | 12.78  | FERMT2, RBFOX2, IQCJ-SCHIP1, LAMC1, IL17RD, PRICKLE2, SVIL, BACE1, GJC1, PRKG1, CRISPLD1, ELOVL4, AKT3, PTRF, WWTR1, TRO, DLG2, BVES, RUNX1T1, DAAM2        |
| hsa-miR-497 | 671      | 13.36  | ZNHIT3, VMA21, C17orf75, NAA25, LRRC58, G2E3, RAD23B, CLDN12, ZNF367, HNRNPA2B1, YWHAQ, PDIK1L, TMEM33, ANLN, SUZ12, IARS, CHORDC1, TBL1XR1, U2SURP, SLC5A3 |
| hsa-miR-429 | 656      | 15.55  | CFL2, MYLK, DNAJB5, KANK2, ZEB1, ZCCHC24, DNAJC18, ABCC9, POU6F1, CLIC4, GPRASP1, NDN, FHL1, DIXDC1, CACNB2, BNC2, AP1S2, GLI3, KCNMB1, NAP1L3              |
| hsa-miR-26a | 654      | 17.44  | KPNA3, KIAA1737, ARPP19, UBR3, COPS2, KIAA1430, GSK3B, RANBP9, CDK8, FBXO28, TMEM106B, CBLL1, G3BP2, KPNA6, CORO1C, ZNF148, MTPN, STXBP4, IPO7, BTBD7       |
| hsa-miR-26b | 652      | 18.24  | LPP, ZYG11B, TMEM43, ABCC9, MAP1B, FAM190B, FAM172A, ANKS1A, MAP4, STRN3, KIAA1737, B3GALNT2, NACC2, BBX, PLEKHM3, MMP16, CORO1C, OSTM1, ARPP19, CACNA1C    |
| hsa-miR-144 | 624      | 19.69  | LPP, LMO3, NAV3, PBX3, CDC42EP3, SYT11, ZFH3, ZEB1, NRP2, CMYA5, MAGI2, DIXDC1, MBNL1, ENOX1, CRISPLD1, SLIT2, NRK, MEF2A, ABI2, NAP1L3                     |

Table 10: Top 10 miRNA with more targets (each miRNA-mRNA pair has pval-corrected<0.05 and appears at least 1 times in the following databases: microCosm\_v5\_18, targetScan\_v6.2\_18). MiRNAs in red are upregulated in CvH, miRNAs in green are downregulated in CvH.

| mRNA           | #miRNAs | miRNAs (top 20)                                                                                                                                                                                                                                                                       |
|----------------|---------|---------------------------------------------------------------------------------------------------------------------------------------------------------------------------------------------------------------------------------------------------------------------------------------|
| <b>FOXP2</b>   | 74      | hsa-miR-15b, hsa-miR-625, hsa-miR-141, hsa-miR-16, hsa-miR-130b*, hsa-miR-590-3p, hsa-miR-7-1*, hsa-miR-576-5p, hsa-miR-15a, hsa-miR-222, hsa-miR-502-3p, hsa-miR-96, hsa-miR-200a, hsa-miR-590-5p, hsa-let-7d, hsa-miR-671-5p, hsa-miR-7, hsa-miR-34a, hsa-miR-197, hsa-miR-182      |
| <b>TNRC6B</b>  | 67      | hsa-miR-130b, hsa-miR-26b, hsa-miR-144, hsa-miR-32, hsa-miR-590-3p, hsa-miR-106b, hsa-miR-16, hsa-miR-7, hsa-miR-3613-5p, hsa-miR-141, hsa-miR-424, hsa-miR-183, hsa-miR-29b, hsa-miR-29a, hsa-miR-590-5p, hsa-miR-455-3p, hsa-miR-3614-5p, hsa-miR-15b, hsa-miR-330-3p, hsa-miR-18a  |
| <b>QKI</b>     | 65      | hsa-miR-429, hsa-miR-141, hsa-miR-200a, hsa-miR-200b, hsa-miR-200c, hsa-miR-96, hsa-miR-532-3p, hsa-miR-194, hsa-miR-130b, hsa-miR-19b, hsa-miR-33a, hsa-miR-92a, hsa-miR-106b, hsa-miR-345, hsa-miR-17, hsa-miR-93*, hsa-miR-500b, hsa-miR-148a, hsa-miR-577, hsa-miR-19a            |
| <b>RORA</b>    | 65      | hsa-miR-141, hsa-miR-106b, hsa-miR-18a, hsa-miR-17, hsa-miR-200a, hsa-miR-15b, hsa-miR-33a, hsa-miR-3613-5p, hsa-miR-19b, hsa-miR-92a, hsa-miR-576-5p, hsa-miR-590-3p, hsa-miR-502-3p, hsa-miR-671-5p, hsa-miR-652, hsa-miR-15a, hsa-miR-183, hsa-miR-19a, hsa-miR-93, hsa-miR-501-3p |
| <b>BNC2</b>    | 60      | hsa-miR-141, hsa-miR-200c, hsa-miR-130b, hsa-miR-106b, hsa-miR-429, hsa-miR-96, hsa-miR-200a, hsa-miR-592, hsa-miR-200b, hsa-miR-7, hsa-miR-17, hsa-miR-19b, hsa-miR-183, hsa-miR-200c*, hsa-miR-191, hsa-miR-577, hsa-miR-590-5p, hsa-miR-7-1*, hsa-miR-182, hsa-miR-19a             |
| <b>AFF4</b>    | 57      | hsa-miR-30b, hsa-miR-374b, hsa-miR-106b, hsa-miR-92a, hsa-miR-29a, hsa-miR-429, hsa-miR-32, hsa-miR-197, hsa-miR-590-3p, hsa-miR-455-5p, hsa-miR-502-3p, hsa-miR-15b, hsa-miR-200c, hsa-miR-17, hsa-miR-25, hsa-miR-505, hsa-miR-374a, hsa-miR-660, hsa-miR-15a, hsa-miR-331-5p       |
| <b>LPP</b>     | 57      | hsa-miR-590-3p, hsa-miR-16, hsa-miR-141, hsa-miR-96, hsa-miR-942, hsa-miR-32, hsa-miR-183, hsa-miR-7, hsa-miR-1266, hsa-miR-15b, hsa-miR-182, hsa-miR-424, hsa-miR-1976, hsa-miR-576-5p, hsa-miR-19b, hsa-miR-18a, hsa-miR-425, hsa-miR-330-5p, hsa-miR-577, hsa-miR-200a             |
| <b>RUNX1T1</b> | 57      | hsa-miR-15b, hsa-miR-130b, hsa-miR-16, hsa-miR-200c, hsa-miR-33a, hsa-miR-429, hsa-miR-148b, hsa-miR-455-3p, hsa-miR-32, hsa-miR-200b, hsa-miR-19b, hsa-miR-15a, hsa-miR-92a, hsa-miR-19a, hsa-let-7d, hsa-miR-192, hsa-miR-25, hsa-miR-107, hsa-miR-29b, hsa-miR-186                 |
| <b>CPEB4</b>   | 55      | hsa-miR-92a, hsa-miR-942, hsa-miR-19b, hsa-miR-130b, hsa-miR-197, hsa-miR-19a, hsa-miR-500b, hsa-miR-27a, hsa-miR-362-5p, hsa-miR-25, hsa-miR-96, hsa-miR-550a, hsa-miR-590-3p, hsa-miR-3647-3p, hsa-miR-128, hsa-let-7d, hsa-miR-26b, hsa-miR-141, hsa-miR-374b, hsa-miR-192         |
| <b>NFIA</b>    | 55      | hsa-miR-130b, hsa-miR-590-5p, hsa-miR-141, hsa-miR-32, hsa-miR-942, hsa-miR-93*, hsa-miR-191, hsa-miR-7, hsa-miR-33a, hsa-miR-454, hsa-miR-25, hsa-miR-200c, hsa-miR-429, hsa-miR-19a, hsa-miR-19b, hsa-miR-301a, hsa-miR-330-3p, hsa-miR-577, hsa-miR-200a, hsa-miR-92a              |

Table 11: Top 10 mRNA with more miRNAs targeting them (each miRNA-mRNA pair has pval-corrected<0.05 and appears at least 1 times in the following databases: mi-croCosm\_v5\_18, targetScan\_v6.2\_18). MRNAs in red are upregulated in CvH, mRNAs in green are downregulated in CvH.

## 6.2 GO analysis

| GOBPID     | Term                                          | Count | Size  | ExpCount | OddsRatio | fdr      | Pvalue   |
|------------|-----------------------------------------------|-------|-------|----------|-----------|----------|----------|
| GO:0009987 | cellular process                              | 8586  | 12932 | 8354.90  | 1.91      | 6.41e-31 | 5.53e-35 |
| GO:0006464 | cellular protein modification process         | 1931  | 2583  | 1668.78  | 1.78      | 1.51e-30 | 3.90e-34 |
| GO:0036211 | protein modification process                  | 1931  | 2583  | 1668.78  | 1.78      | 1.51e-30 | 3.90e-34 |
| GO:0016043 | cellular component organization               | 3304  | 4619  | 2984.17  | 1.58      | 5.28e-30 | 1.82e-33 |
| GO:0071840 | cellular component organization or biogenesis | 3365  | 4715  | 3046.19  | 1.57      | 1.57e-29 | 6.78e-33 |
| GO:0043412 | macromolecule modification                    | 1994  | 2685  | 1734.68  | 1.74      | 4.11e-29 | 2.13e-32 |
| GO:0044267 | cellular protein metabolic process            | 2456  | 3370  | 2177.24  | 1.64      | 3.37e-28 | 2.03e-31 |
| GO:0006793 | phosphorus metabolic process                  | 2061  | 2809  | 1814.79  | 1.65      | 3.34e-25 | 2.51e-28 |
| GO:0050794 | regulation of cellular process                | 5447  | 7941  | 5130.40  | 1.46      | 3.34e-25 | 2.59e-28 |
| GO:0044237 | cellular metabolic process                    | 6031  | 8855  | 5720.90  | 1.47      | 4.77e-25 | 4.12e-28 |

Table 12: Biological Process . Options used: mRNAs that are present in a mRNA-mRNA pair that has adjusted-pval cutoff  $<0.05$ ; that also appears at least 1 times (databases: microCosm\_v5\_18, targetScan\_v6.2\_18); organism: human.

| GOCCID     | Term                                     | Count | Size  | ExpCount | OddsRatio | fdr       | Pvalue    |
|------------|------------------------------------------|-------|-------|----------|-----------|-----------|-----------|
| GO:0044424 | intracellular part                       | 8246  | 12258 | 7540.33  | 2.46      | 2.62e-137 | 1.95e-140 |
| GO:0005622 | intracellular                            | 8322  | 12396 | 7625.22  | 2.47      | 7.87e-137 | 1.17e-139 |
| GO:0005737 | cytoplasm                                | 6465  | 9342  | 5746.60  | 2.10      | 7.01e-115 | 1.56e-117 |
| GO:0043226 | organelle                                | 7566  | 11215 | 6898.74  | 2.13      | 1.04e-109 | 3.10e-112 |
| GO:0043227 | membrane-bounded organelle               | 7078  | 10399 | 6396.79  | 2.08      | 6.74e-108 | 2.50e-110 |
| GO:0043229 | intracellular organelle                  | 7191  | 10617 | 6530.89  | 2.05      | 9.60e-103 | 4.28e-105 |
| GO:0043231 | intracellular membrane-bounded organelle | 6546  | 9551  | 5875.16  | 2.00      | 5.33e-101 | 2.78e-103 |
| GO:0044444 | cytoplasmic part                         | 4827  | 6864  | 4222.29  | 1.91      | 2.79e-84  | 1.66e-86  |
| GO:0044446 | intracellular organelle part             | 4392  | 6274  | 3859.36  | 1.80      | 1.26e-67  | 8.44e-70  |
| GO:0044422 | organelle part                           | 4502  | 6449  | 3967.01  | 1.80      | 1.78e-67  | 1.33e-69  |

Table 13: Cellular Component . Options used: mRNAs that are present in a mRNA-mRNA pair that has adjusted-pval cutoff  $<0.05$ ; that also appears at least 1 times (databases: microCosm\_v5\_18, targetScan\_v6.2.18); organism: human.

| GOMFID     | Term                            | Count | Size  | ExpCount | OddsRatio | fdr      | Pvalue   |
|------------|---------------------------------|-------|-------|----------|-----------|----------|----------|
| GO:0005515 | protein binding                 | 5593  | 7904  | 4974.68  | 2.03      | 2.25e-93 | 6.53e-97 |
| GO:0005488 | binding                         | 8058  | 12075 | 7599.85  | 2.18      | 5.07e-77 | 2.95e-80 |
| GO:0043167 | ion binding                     | 3986  | 5793  | 3646.04  | 1.51      | 1.80e-29 | 1.57e-32 |
| GO:0043168 | anion binding                   | 1821  | 2493  | 1569.06  | 1.74      | 1.28e-28 | 1.49e-31 |
| GO:1901265 | nucleoside phosphate binding    | 1660  | 2255  | 1419.27  | 1.78      | 1.52e-28 | 2.21e-31 |
| GO:0000166 | nucleotide binding              | 1659  | 2254  | 1418.64  | 1.78      | 1.53e-28 | 2.67e-31 |
| GO:0017076 | purine nucleotide binding       | 1348  | 1819  | 1144.86  | 1.80      | 1.77e-24 | 3.61e-27 |
| GO:0097367 | carbohydrate derivative binding | 1548  | 2115  | 1331.15  | 1.73      | 1.87e-24 | 4.34e-27 |
| GO:0003824 | catalytic activity              | 3571  | 5197  | 3270.93  | 1.47      | 2.28e-24 | 5.96e-27 |
| GO:0032555 | purine ribonucleotide binding   | 1334  | 1800  | 1132.90  | 1.80      | 2.36e-24 | 6.84e-27 |

Table 14: Molecular Function . Options used: mRNAs that are present in a mRNA-mRNA pair that has adjusted-pval cutoff  $<0.05$ ; that also appears at least 1 times (databases: microCosm\_v5\_18, targetScan\_v6.2.18); organism: human.

| KEGGID | Term                                        | Count | Size | ExpCount | OddsRatio | fdr      | Pvalue   |
|--------|---------------------------------------------|-------|------|----------|-----------|----------|----------|
| 05200  | Pathways in cancer                          | 253   | 314  | 201.06   | 2.43      | 6.42e-09 | 3.88e-11 |
| 04510  | Focal adhesion                              | 163   | 192  | 122.94   | 3.26      | 6.42e-09 | 5.65e-11 |
| 04722  | Neurotrophin signaling pathway              | 105   | 125  | 80.04    | 3.01      | 3.89e-05 | 5.14e-07 |
| 04810  | Regulation of actin cytoskeleton            | 161   | 203  | 129.99   | 2.21      | 5.85e-05 | 1.14e-06 |
| 04141  | Protein processing in endoplasmic reticulum | 132   | 163  | 104.37   | 2.44      | 5.85e-05 | 1.29e-06 |
| 05100  | Bacterial invasion of epithelial cells      | 61    | 69   | 44.18    | 4.34      | 1.58e-04 | 4.18e-06 |
| 04666  | Fc gamma R-mediated phagocytosis            | 78    | 92   | 58.91    | 3.18      | 2.45e-04 | 7.57e-06 |
| 05222  | Small cell lung cancer                      | 71    | 83   | 53.15    | 3.37      | 2.51e-04 | 1.01e-05 |
| 05215  | Prostate cancer                             | 74    | 87   | 55.71    | 3.24      | 2.51e-04 | 1.02e-05 |
| 04360  | Axon guidance                               | 102   | 125  | 80.04    | 2.53      | 2.51e-04 | 1.11e-05 |

Table 15: Kegg Pathways . Options used: mRNAs that are present in a mRNA-mRNA pair that has adjusted-pval cutoff  $<0.05$ ; that also appears at least 1 times (databases: microCosm\_v5\_18, targetScan\_v6.2\_18); organism: human.
